# Supplementary material for: Improving the Yield and Quality of Tomato by Using Organic Fertilizer and Silicon Compared to Reducing Chemical Nitrogen Fertilization
Source: MDPI journal article supplement (doi:10.3390/agronomy14050966), 2024-05-04
Supplement: s1 [file s1]

Supplementary figure S1

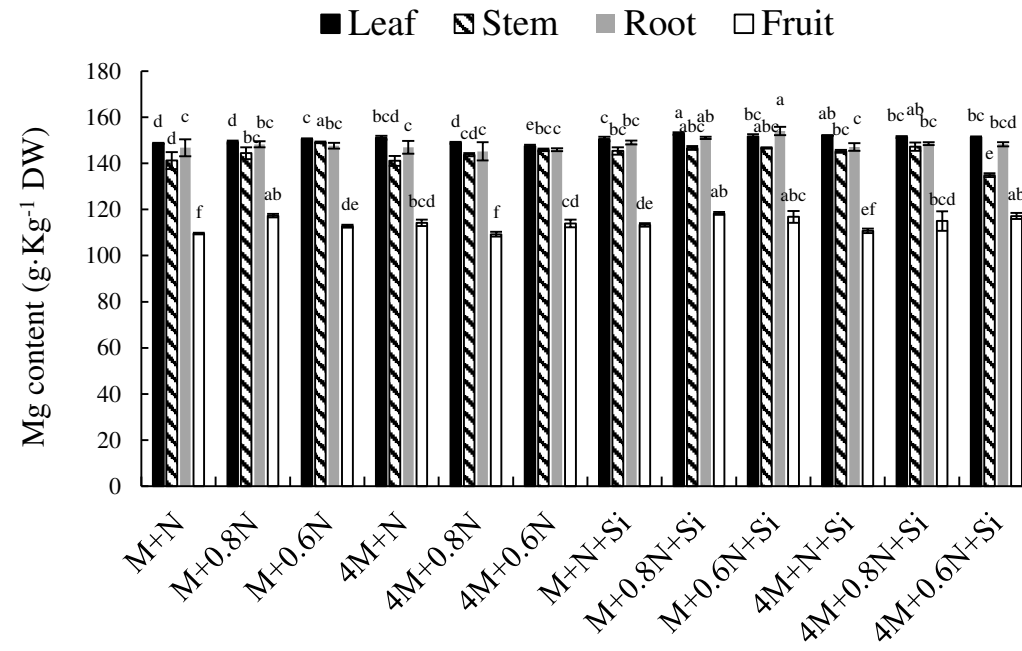

Supplementary figure S1: Effects of reducing nitrogen fertilizer and increasing silicon fertilizer combined with organic fertilizer on Mg contents in leaves, stems, roots and fruits of tomato plants. Data are shown as means $\pm$ standard deviation of three replicates. Means denoted by different letters indicate statistically significant differences at  $P \leq 0.05$ . The different textures of the bar charts indicated different parts/tissues of tomato plants, the letters on the figure show the significant differences among treatments under the same tissue of tomato plants.

**Table S1. The comprehensive factor score (Y value) of macro elements related indicators and the ranking of each processing method.**

| Treatments | $Y_1$  | $Y_2$  | $Y_3$  | $Y_4$  | $Y$    | Order |
|------------|--------|--------|--------|--------|--------|-------|
| M+N        | -3.315 | 0.852  | 1.025  | 0.734  | -1.029 | 10    |
| M+0.8N     | -1.999 | -0.154 | 0.257  | 1.221  | -0.720 | 9     |
| M+0.6N     | -1.868 | -3.314 | -0.629 | 0.962  | -1.431 | 11    |
| 4M+N       | -2.781 | -0.303 | -0.670 | -2.931 | -1.635 | 12    |
| 4M+0.8N    | -0.616 | 0.824  | -1.034 | -0.103 | -0.252 | 8     |
| 4M+0.6N    | -0.532 | 1.400  | 0.042  | 0.034  | 0.057  | 6     |
| M+N+Si     | 0.212  | 0.958  | 2.026  | 0.514  | 0.606  | 5     |
| M+0.8N+Si  | 2.769  | 0.202  | 1.558  | -0.313 | 1.397  | 1     |
| M+0.6N+Si  | 3.235  | -2.827 | 0.701  | -0.499 | 0.866  | 4     |
| 4M+N+Si    | 0.196  | 0.185  | -0.631 | 0.135  | 0.048  | 7     |
| 4M+0.8N+Si | 2.495  | 0.949  | -2.735 | 0.946  | 0.973  | 3     |
| 4M+0.6N+Si | 2.204  | 1.228  | 0.091  | -0.700 | 1.119  | 2     |

**Table S2. The comprehensive factor score (Y value) of trace elements related indicators and the ranking of each treatment method.**

| Treatments | $Y_1$  | $Y_2$  | $Y_3$  | $Y_4$  | $Y$    | Order |
|------------|--------|--------|--------|--------|--------|-------|
| M+N        | -3.907 | 0.354  | 1.503  | 0.364  | -1.415 | 12    |
| M+0.8N     | -1.678 | -1.854 | 1.528  | 0.484  | -0.797 | 8     |
| M+0.6N     | -2.395 | -2.295 | 0.244  | 0.996  | -1.286 | 11    |
| 4M+N       | -1.729 | 0.148  | -1.762 | -2.367 | -1.162 | 10    |
| 4M+0.8N    | -2.817 | 2.053  | -1.089 | 0.329  | -0.983 | 9     |
| 4M+0.6N    | -1.183 | 0.896  | 0.701  | -0.752 | -0.352 | 7     |
| M+N+Si     | 0.875  | -1.718 | -1.886 | 0.049  | -0.125 | 6     |
| M+0.8N+Si  | 2.960  | -1.747 | 0.002  | -0.553 | 0.942  | 4     |
| M+0.6N+Si  | 4.195  | -0.451 | -0.016 | 1.109  | 1.844  | 1     |
| 4M+N+Si    | 1.407  | 0.701  | -1.189 | -0.407 | 0.540  | 5     |
| 4M+0.8N+Si | 1.204  | 2.443  | -0.586 | 2.264  | 1.064  | 3     |
| 4M+0.6N+Si | 3.068  | 1.470  | 2.551  | -1.514 | 1.730  | 2     |
